# Supplementary material
Source: MDPI journal article supplement (https://www.mdpi.com/2076-3417/13/19/10899)
Supplement: s1 [file s1]

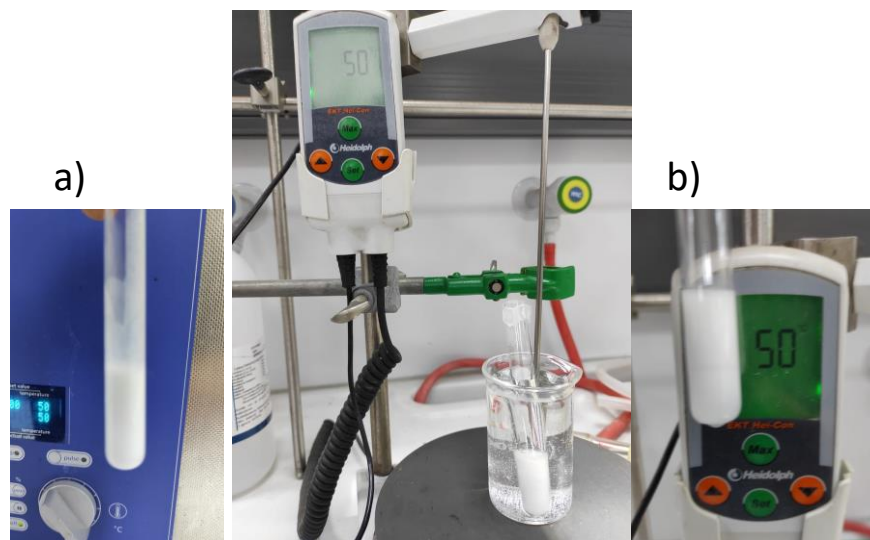

**Figure S1:** Water/toluene emulsion ( $f = 0.5$ ) before (a) and after two hours at 50 °C (b)

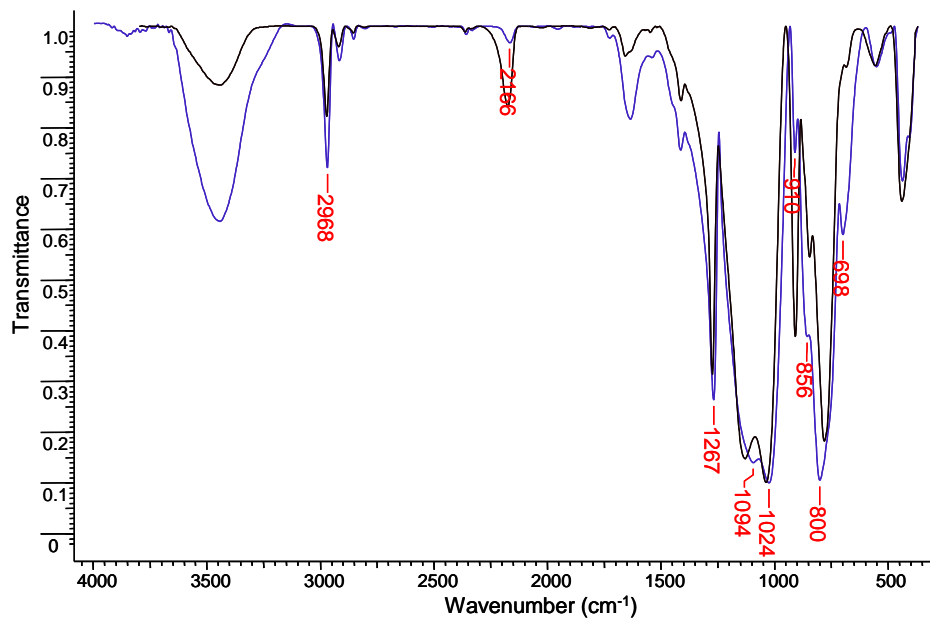

**Figure S2:** FT-IR spectra of DH44 (blue) and DH100 (black)

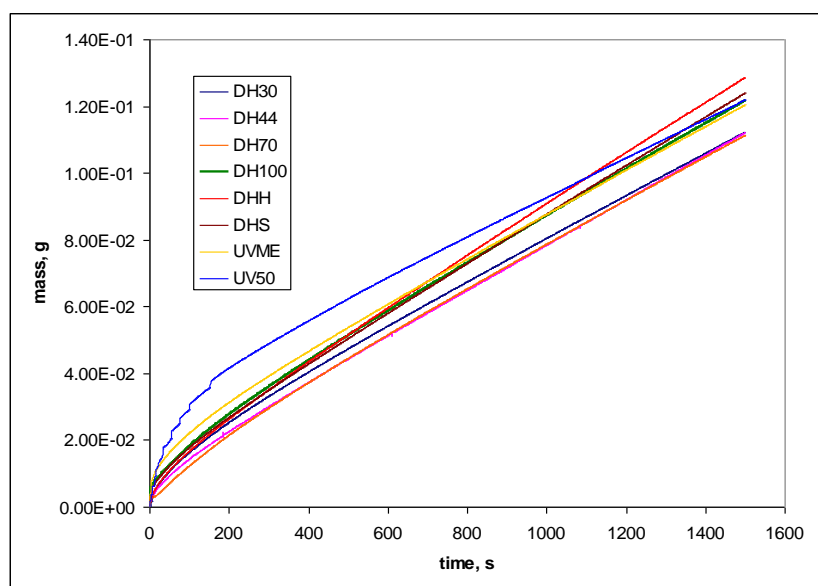

**Figure S3:** Hexane sorption isotherms

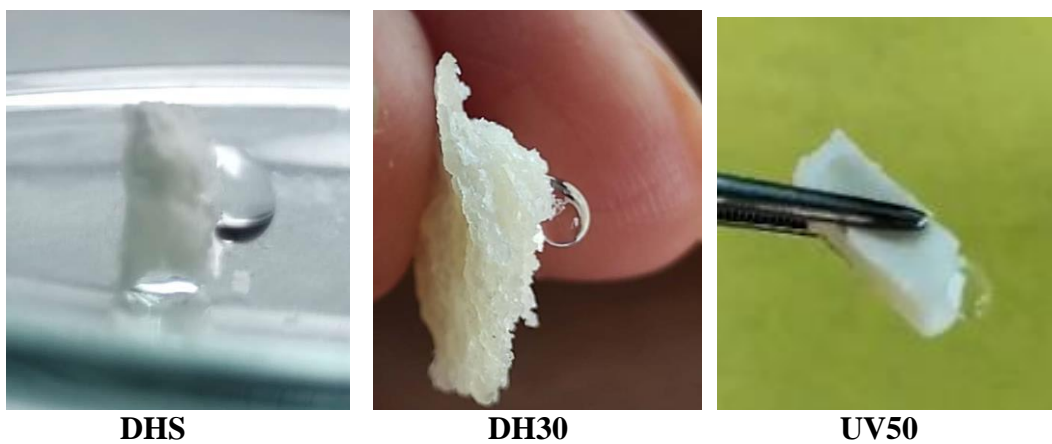

**Figure S4:** The petal effect on porous samples

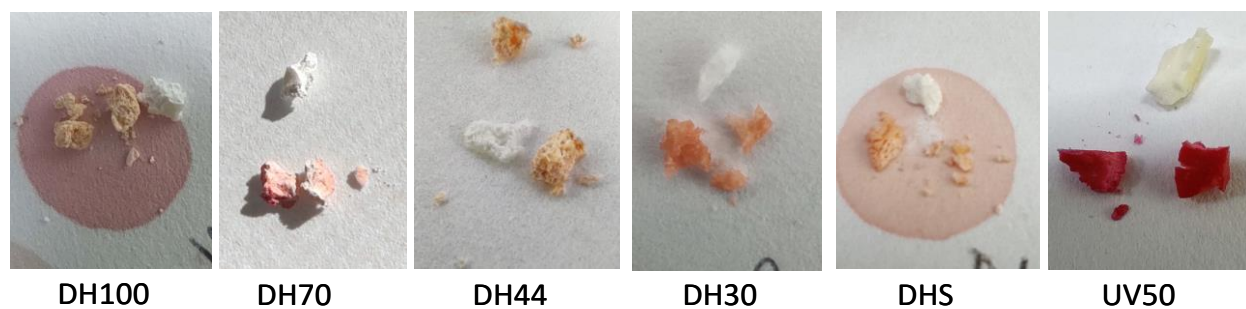

**Figure S5:** Samples stained with DR1 acetone solution (acetone is a non-solvent for the silicone materials): after a few minutes the inner surface of the samples is obviously colored, as compared with the non-stained pieces of material

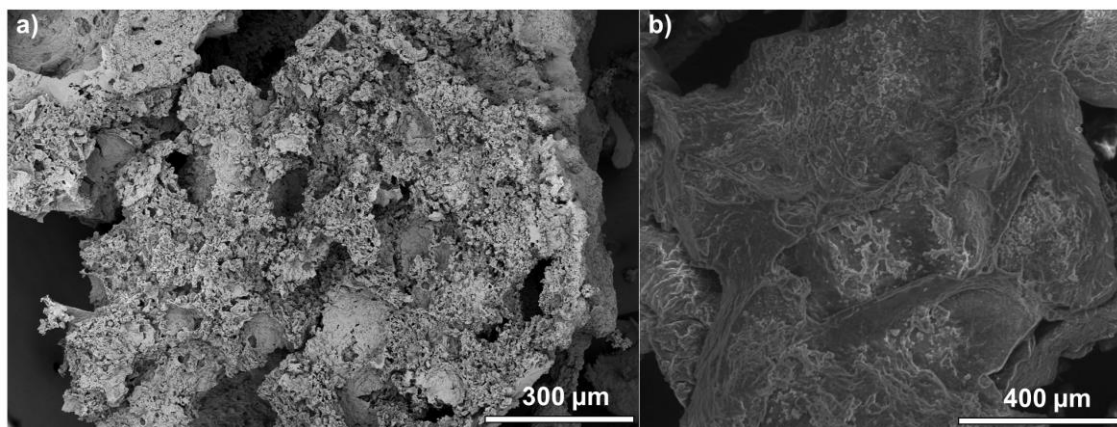

**Figure S6:** Comparison of large scale morphology of sample DH44 with lotus effect (a) and DH30 with petal effect (b).

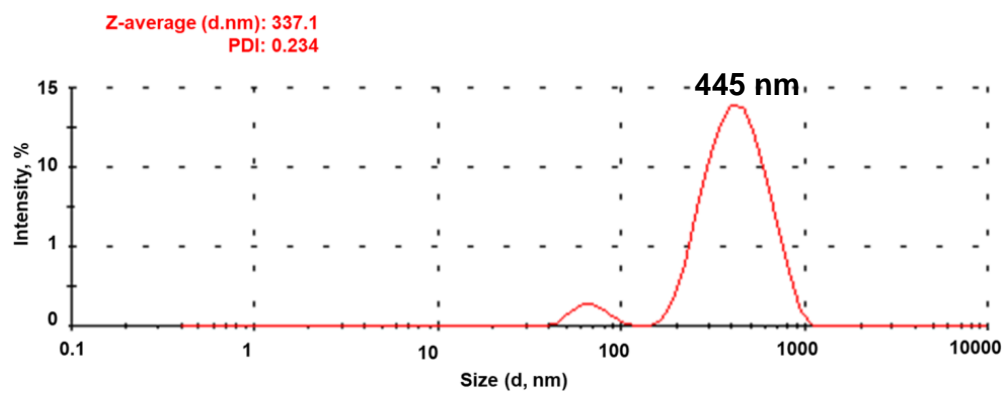

**Figure S7:** DLS analysis of the emulsion template (water in toluene,  $f=0.5$ )
