# Supplementary material
Source: MDPI journal article supplement (https://www.mdpi.com/2076-3417/13/19/10899)
Supplement: s1 [file s1]

Archive with 3 entries (3 files):
- Supplementary S1.pdf
- Supplementary S2.mp4
- Supplementary S3.mp4
